# Supplementary material for: Adhesion GPCR Latrophilin-2 Specifies Cardiac Lineage Commitment through CDK5, Src, and P38MAPK
Source: PubMed Central journal article supplement — Stem Cell Reports. 2021 Apr 1;16(4):868–82. doi: 10.1016/j.stemcr.2021.03.003 (PMC8072181; doi:10.1016/j.stemcr.2021.03.003), 2021-04-01
Supplement: mmc1.pdf [file mmc1.pdf]

**Stem Cell Reports, Volume 16**

**Supplemental Information**

**Adhesion GPCR Latrophilin-2 Specifies Cardiac Lineage Commitment  
through CDK5, Src, and P38MAPK**

**Choon-Soo Lee, Hyun-Jai Cho, Jin-Woo Lee, HyunJu Son, Jinho Chai, and Hyo-Soo Kim**

# Supplemental Information

## **Adhesion GPCR, latrophilin-2, specifies cardiac lineage commitment through CDK5, Src, and P38MAPK**

Choon-Soo Lee,<sup>1,2,5</sup> Hyun-Jai Cho,<sup>4,5</sup> Jin-Woo Lee,<sup>1,2</sup> HyunJu Son,<sup>1,2</sup> Jinho Chai,<sup>1,3</sup>  
and Hyo-Soo Kim,<sup>1,2,3\*</sup>

<sup>1</sup>Strategic Center of Cell & Bio Therapy, Seoul 03080, Republic of Korea

<sup>2</sup>Molecular Medicine and Biopharmaceutical Sciences, Graduate School of Convergence Science and Technology, Seoul National University, Seoul, Republic of Korea

<sup>3</sup>Program in Stem Cell Biology, Seoul National University College of Medicine, Seoul, Republic of Korea

<sup>4</sup>Department of Internal Medicine, Seoul National University Hospital, Seoul, Republic of Korea

**Figure S1**

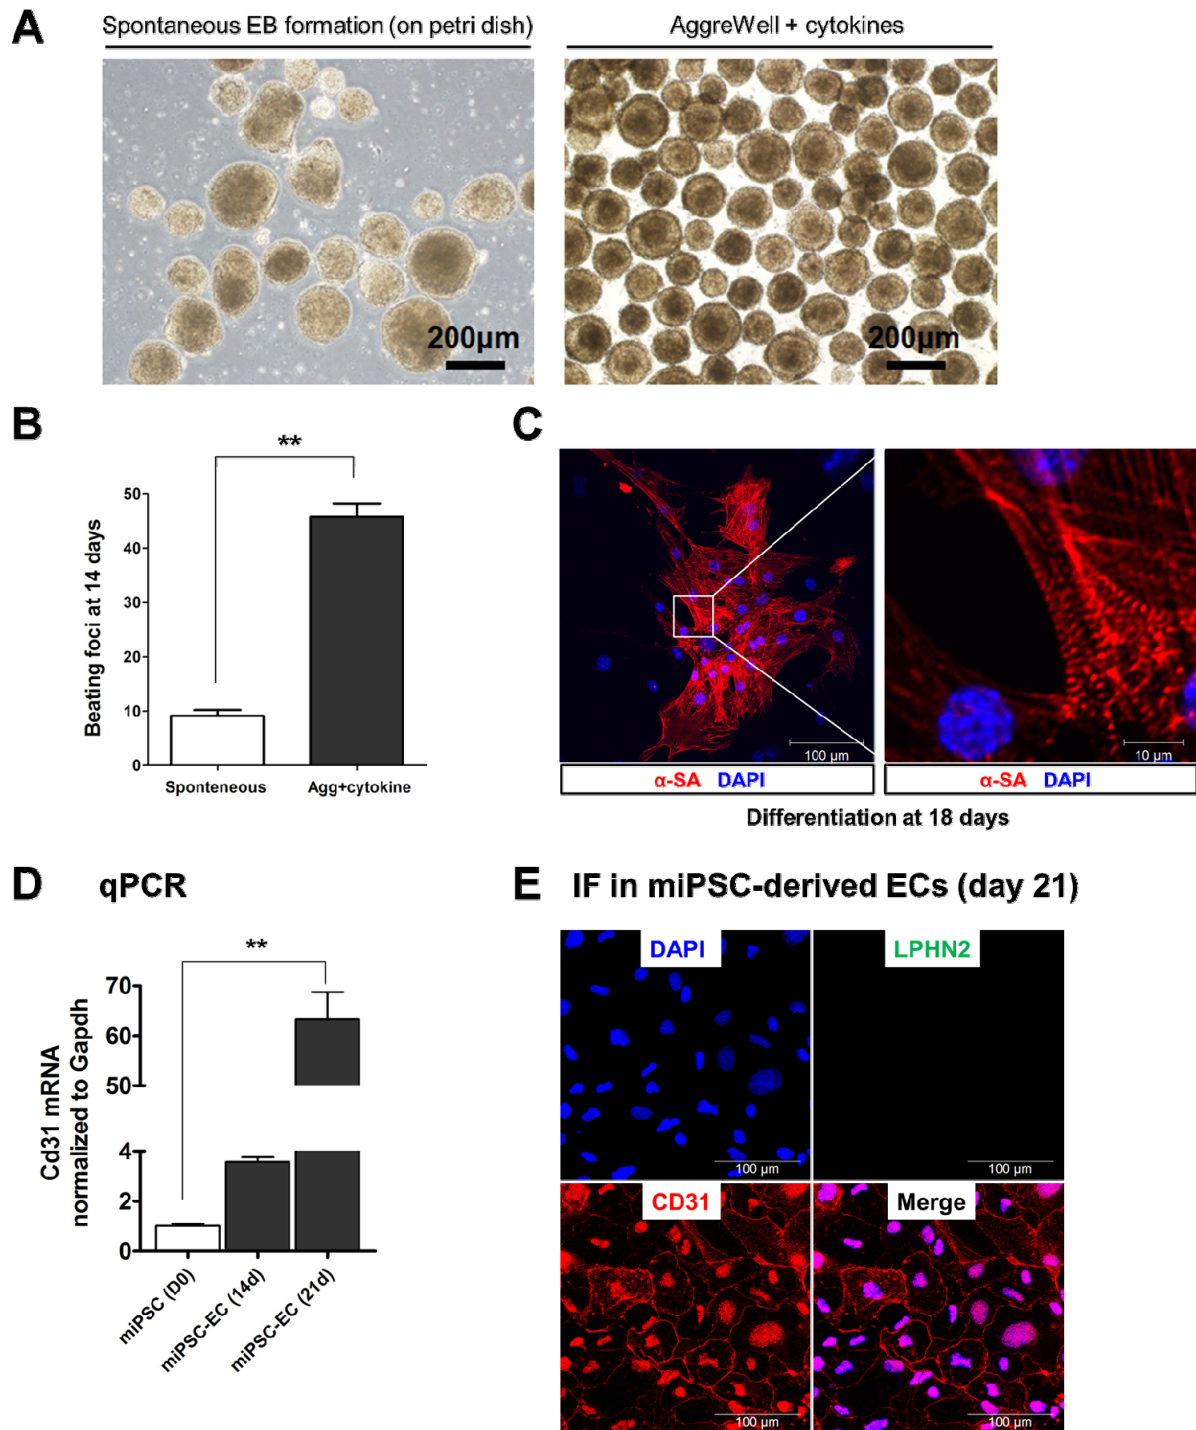

**Figure S1 (Related to Figure 1). Optimized culture conditions for cardiac differentiation and LPHN2 expression in mouse iPSC-derived ECs.**

(A) Comparison of the size and shape of EBs using Petri dishes and AggreWell plates at day 4 after differentiation. The EB populations on AggreWell plates are uniform in size and shape relative to those of the petri dish culture. Scale bar, 200  $\mu\text{m}$ . (B) Beating foci count in cardiac differentiation culture at 14 days.  $**P < 0.01$ , Mann–Whitney U test,  $n = 8$  independent biological replicates. (C) Immunostaining for  $\alpha$ -sarcomeric actinin ( $\alpha$ -SA, red) in cardiac differentiation culture at day 18. Blue, nuclear counterstain with 4, 6-diamidino-2-phenylindole (DAPI). A white rectangle in the left image indicates the regions shown at higher magnification. Scale bars, 100  $\mu\text{m}$  (left panels) or 10  $\mu\text{m}$  (right panels). (D) Gene expression analysis of mouse iPSC-derived endothelial cells analyzed by qPCR for *Cd31*. Expression values are shown relative to that of miPSCs (D0).  $**P < 0.01$ , ANOVA test and *post hoc* Bonferroni test,  $n = 3$  independent replicates. (E) Immunostaining for LPHN2 (green) and CD31 (red) in mouse iPSC-derived ECs. Scale bar, 100  $\mu\text{m}$ . Scale bar, 100  $\mu\text{m}$ .

**Figure S2**

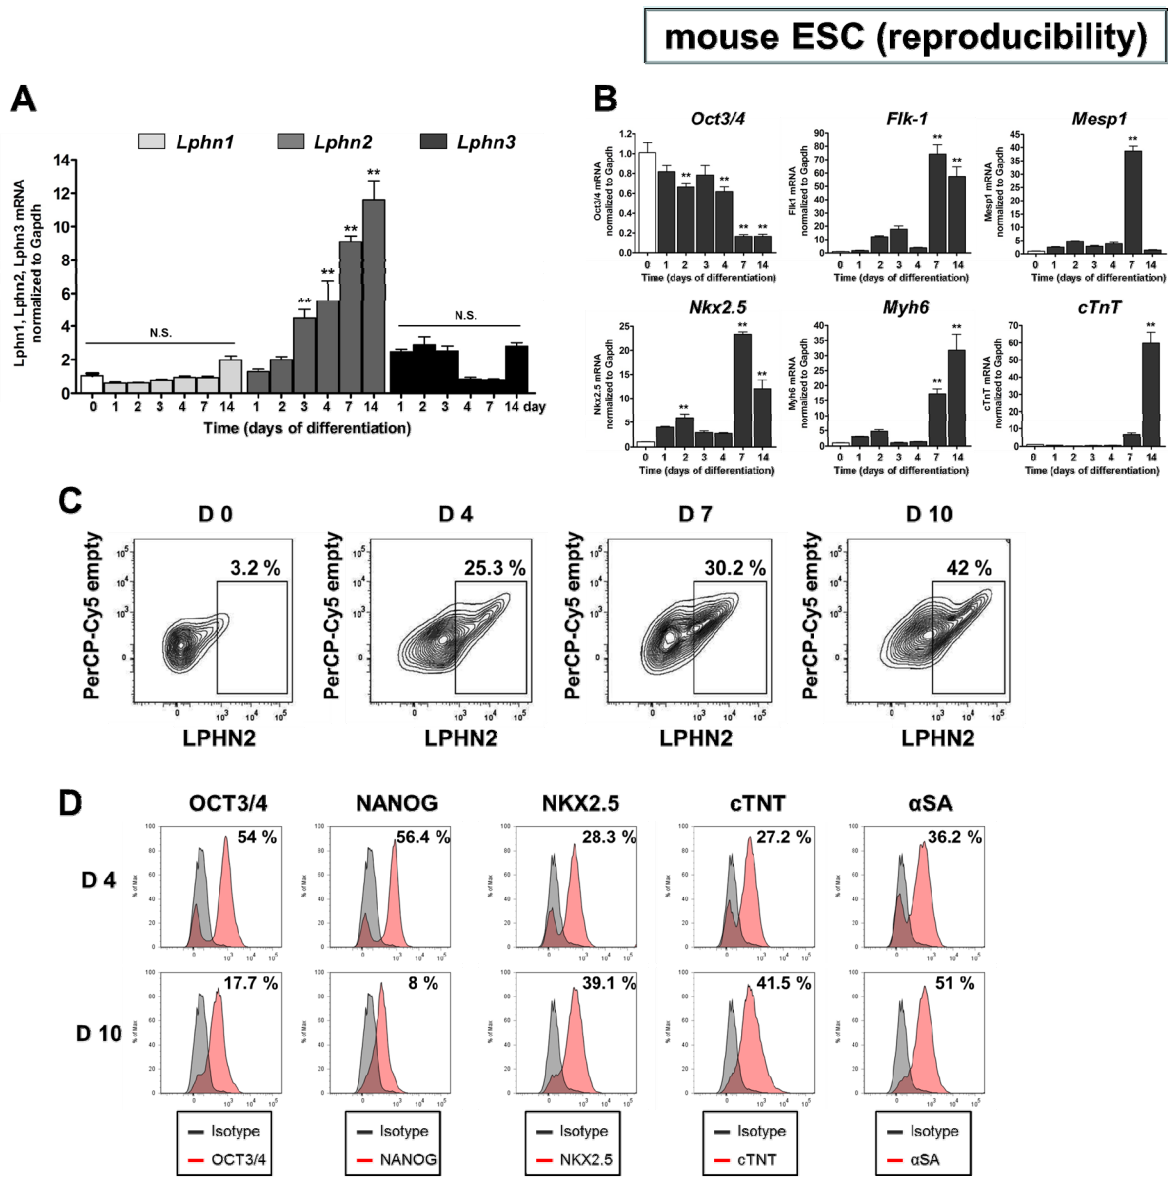

**Figure S2 (Related to Figure 1). Reproducibility of iPSC findings in mouse ESCs.**

(A) Gene expression analysis by qPCR of *Lphn1*, *Lphn2*, and *Lphn3* in ESCs following cardiac differentiation. Values are shown relative to day 0.  $**P < 0.01$ , N.S. (not significant), ANOVA test and *post hoc* Bonferroni test,  $n = 3$  independent replicates. (B) mRNA expression levels of *Oct3/4*, *Flk-1*, *Mesp1*, *Nkx2.5*, *Myh6*, and *cTnT* in ESC-derived cells during cardiac differentiation.  $**P < 0.01$ , ANOVA test and *post hoc* Bonferroni test,  $n = 3$  independent replicates. (C) Sequential changes in LPHN2 expression in ESC-derived cardiac lineage populations by FACS analysis. (D) FACS analysis of multiple markers (OCT3/4, NANOG, NKX2.5, cTNT, and  $\alpha$ SA) in ESC-derived cells during cardiac differentiation.

Figure S3

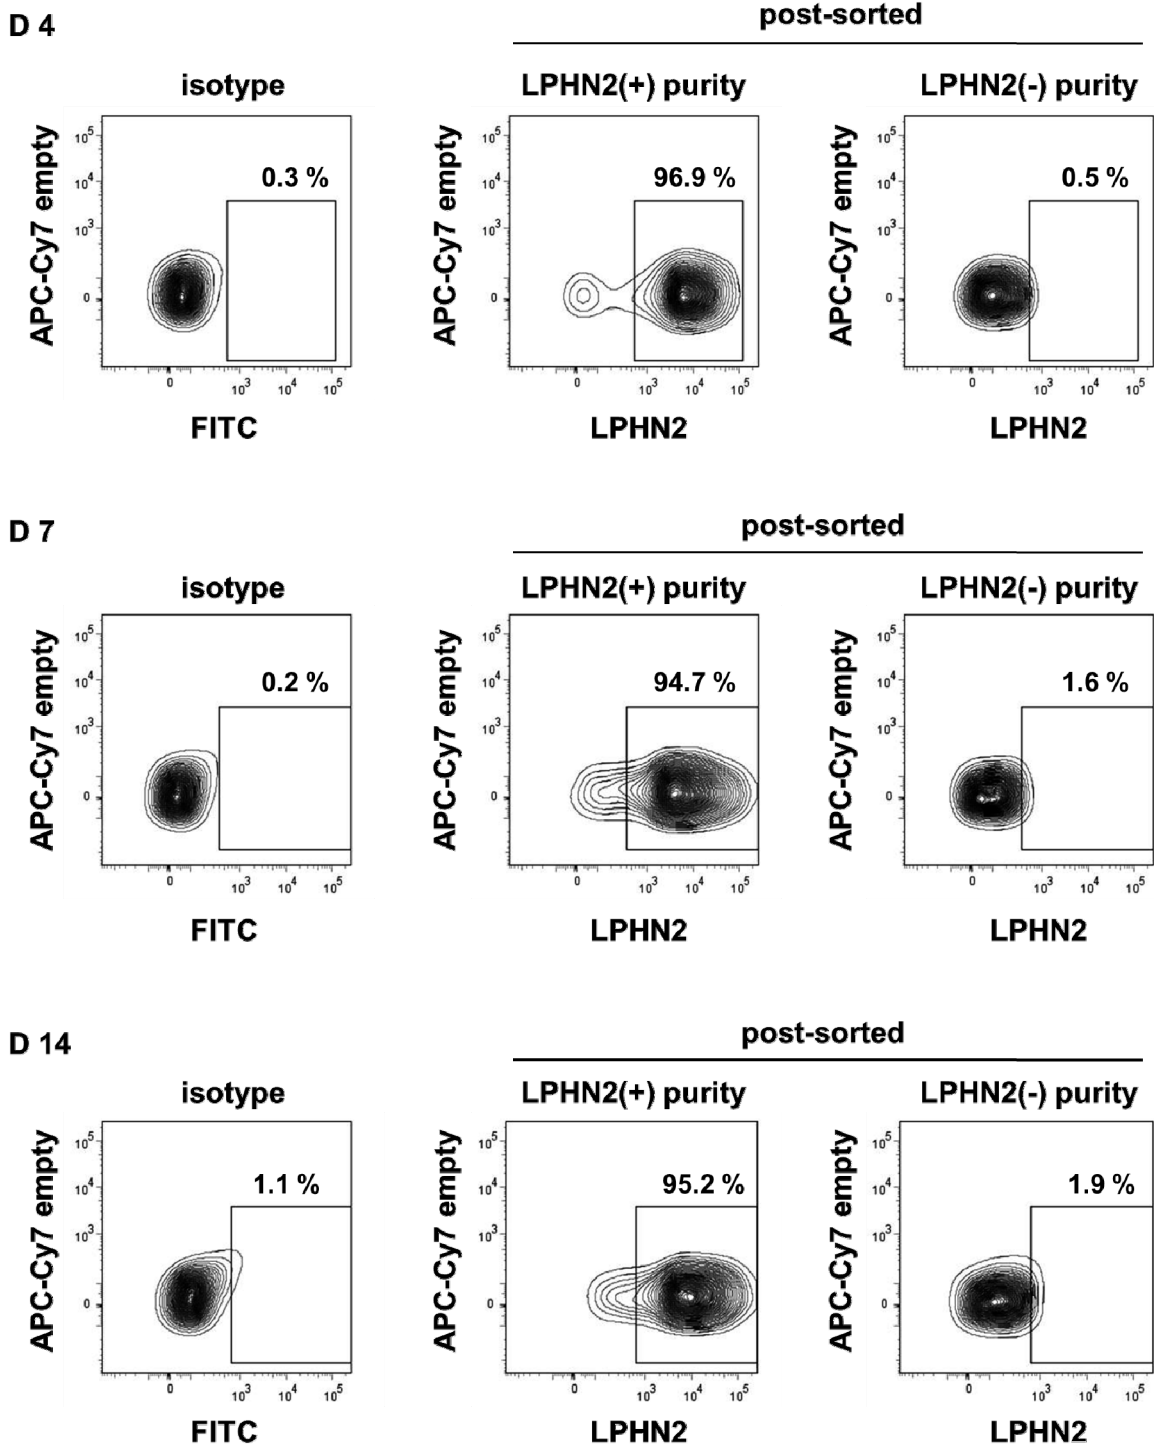

Figure S3 (Related to Figure 2). Sorting purity of LPHN2<sup>+</sup> and LPHN2<sup>-</sup> fractions in iPSC-derived cells during cardiac differentiation.

Figure S4

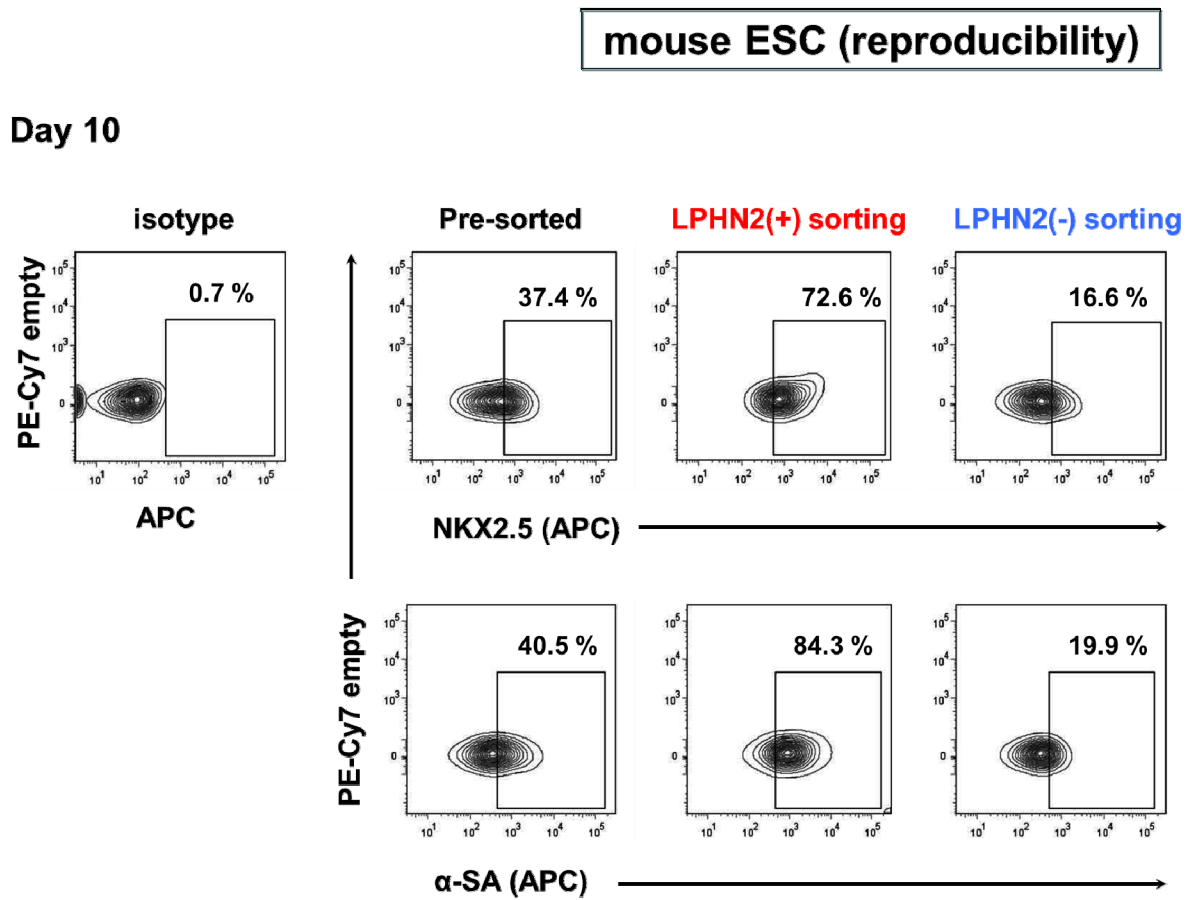

Figure S4 (Related to Figure 2). Enriched expression of NKX2.5 and  $\alpha$ -SA sorted by LPHN2 in mouse ESCs.

Representative FACS plot showing surface expression of NKX2.5 and  $\alpha$ -SA at 10 days after cardiac differentiation for pre-sort, LPHN2<sup>+</sup>, and LPHN2<sup>-</sup> fraction in mouse ESC-derived cells.

**Figure S5**

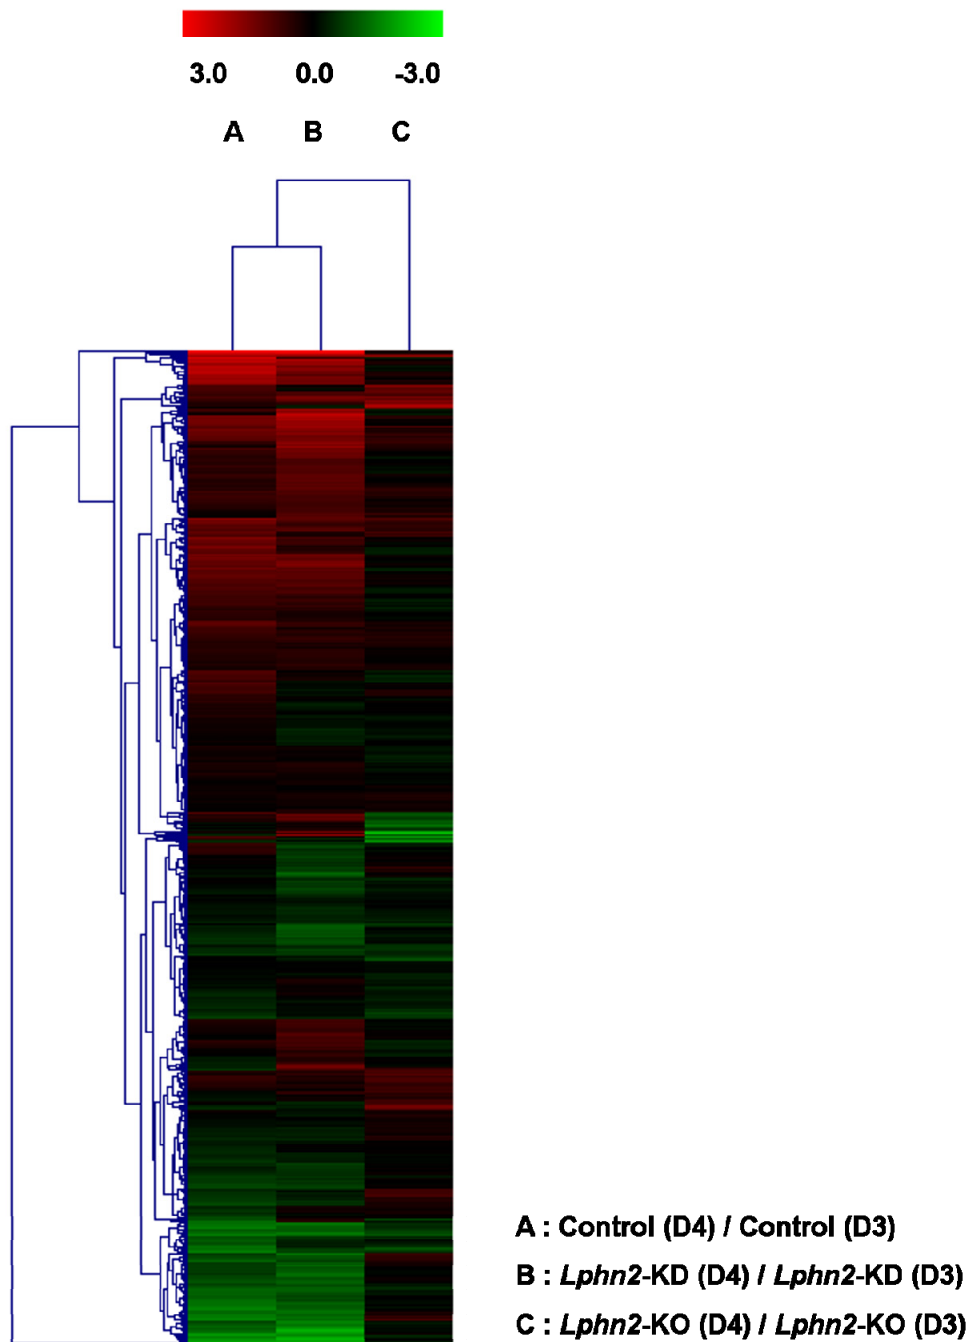

**Figure S5 (Related to Figure 4).** Heat map based on a Phospho Explorer Antibody Array. Differential phosphorylation ratio between groups A (control (D4)/control (D3)), B (*Lphn2*-KD (D4)/*Lphn2*-KD (D3)), and C (*Lphn2*-KO (D4)/*Lphn2*-KO (D3)).



Figure S6

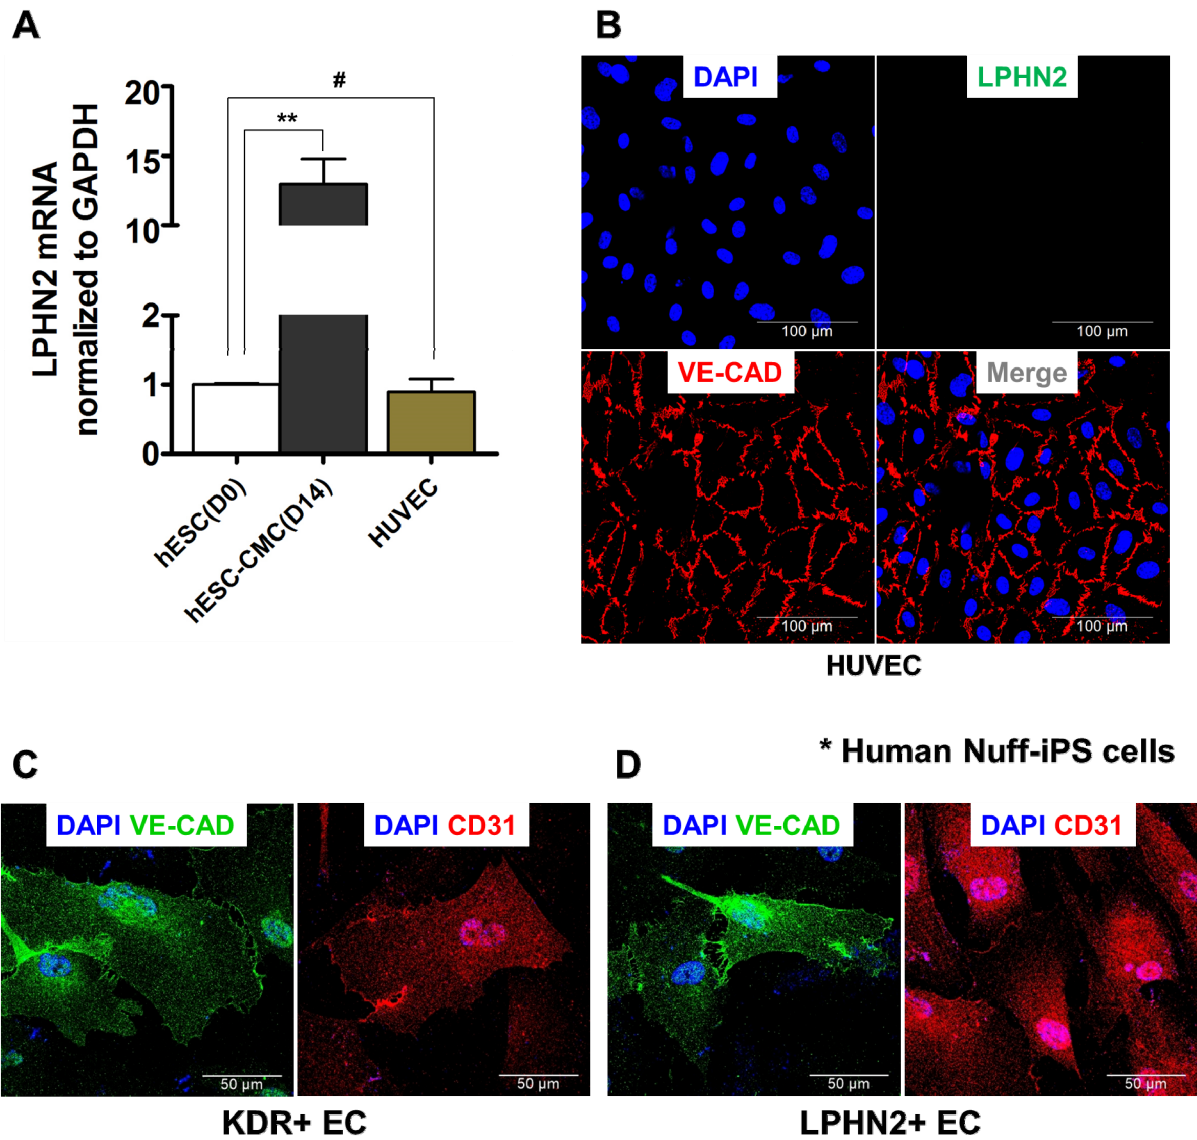

Figure S6 (Related to Figure 6). LPHN2 expression in HUVEC and endothelial differentiation potential of the KDR-positive or LPHN2-positive population.

(A) qPCR analysis of *LPHN2* expression in human ESCs, human ESC-derived CMCs and HUVECs. Expression values are shown relative to that of hESCs (D0).  $**P < 0.01$ ,  $\#P = \text{N.S.}$  (not significant), ANOVA test and *post hoc* Bonferroni test,  $n = 3$  independent replicates. (B) Immunostaining for LPHN2 (green) and VE-Cadherin (red) in HUVECs. Blue, nuclear counterstaining with 4, 6-diamidino-2-phenylindole (DAPI). Scale bar, 100  $\mu\text{m}$ .

**(C)** Immunofluorescence analysis for EC markers (VE-Cadherin and CD31) in  $KDR^+$  cells differentiated toward endothelial lineages on day 14. Blue, nuclear counterstaining with 4, 6-diamidino-2-phenylindole (DAPI). **(D)** Immunostaining of VE-Cadherin and CD31 in  $LPHN2^+$  cells on day 14 of endothelial differentiation. Blue, nuclear counterstaining with 4, 6-diamidino-2-phenylindole (DAPI). Scale bar, 50  $\mu\text{m}$ .

## Supplemental Movie Legends

**Movie S1 (Related to Figure 3).** Beating foci following control-iPSCs and cardiac differentiation. On day 10 of cardiac differentiation, control-shRNA transduced iPSCs exhibited robust beating.

**Movie S2 (Related to Figure 3).** Beating foci following *Lphn2* knockdown (KD) and cardiac differentiation. On day 10 of cardiac differentiation, *Lphn2*-shRNA transduced iPSCs did not beat spontaneously.

**Movie S3 (Related to Figure 3).** Beating foci following wild-type ESCs and cardiac differentiation. On day 10 of cardiac differentiation, there were several spontaneous beating foci in wild-type ESCs.

**Movie S4 (Related to Figure 3).** Beating foci following *Lphn2* knockout (KO) and cardiac differentiation. On day 10 of cardiac differentiation, there were not spontaneous beating foci in *Lphn2*-KO ESCs.

**Table S1.** PCR primers used in this study

| <b>Primer</b>        | <b>Sequence</b>                            | <b>Access Number</b> |
|----------------------|--------------------------------------------|----------------------|
| <i>Mouse</i>         | Forward 5'- AAGACATGAATGCCACCGAA -3'       | NM_181039.2          |
| <i>Lphn1</i>         | Reverse 5'- CTCTTGGGGGAACACCAACT -3'       |                      |
| <i>Mouse</i>         | Forward 5'- GCTGCAAGCTGGTTGACACT -3'       | NM_001081298.1       |
| <i>Lphn2</i>         | Reverse 5'- GATGCAGATAGCCAGGCAGA -3'       |                      |
| <i>Mouse</i>         | Forward 5'- TTTATAGGACCGGCGACCTT -3'       | NM_198702.2          |
| <i>Lphn3</i>         | Reverse 5'- TACATGAGTCCAAAGGCCCA -3'       |                      |
| <i>Mouse</i>         | Forward 5'- CAGAAAAACCAGTGGTTGAAGACTAG -3' | NM_001289828.1       |
| <i>Nanog</i>         | Reverse 5'- GCAATGGATGCTGGGATACTC -3       |                      |
| <i>Mouse</i>         | Forward 5'- GAGGATCACTGGGGTACA -3'         | NM_013633.3          |
| <i>Oct3/4</i>        | Reverse 5'- CTCGAAGCGACAGATGGTG -3'        |                      |
| <i>Mouse</i>         | Forward 5'- GCGGTGGTGACAGTATCTT -3'        | NM_010612.2          |
| <i>Flk-1</i>         | Reverse 5'- CTCGGTGATGTACACGATGC -3'       |                      |
| <i>Mouse</i>         | Forward 5'- TCCATGCTAGACTCAGAAGTCA -3'     | NM_001083316.2       |
| <i>PdgfR-α</i>       | Reverse 5'- TCCCGGTGGACACAATTTTTC -3'      |                      |
| <i>Mouse</i>         | Forward 5'- TGTACGCAGAAACAGCATCC -3'       | NM_008588.2          |
| <i>Mesp1</i>         | Reverse 5'- TTGTCCCCTCCACTCTTCAG -3'       |                      |
| <i>Mouse</i>         | Forward 5'- GACAAAGCCGAGACGGATGG -3'       | NM_008700.2          |
| <i>Nkx2.5</i>        | Reverse 5'- CTGTGCTTGCCTTGTAGC -3'         |                      |
| <i>Mouse</i>         | Forward 5'- ACGGTGACCATAAAGGAGGA -3'       | NM_001164171.1       |
| <i>Myh6</i>          | Reverse 5'- TGTCCCTCGATCTTGTGGAAC -3'      |                      |
| <i>Mouse</i>         | Forward 5'- CAGAGGAGGCCAACGTAGAAG -3'      | NM_001130174.2       |
| <i>cTnT (Tnnt2)</i>  | Reverse 5'- CTCCATCGGGGATCTTGGGT -3'       |                      |
| <i>Mouse</i>         | Forward 5'- GGAGCCTGATTCCAAAGACA -3'       | NM_011537.3          |
| <i>Tbx5</i>          | Reverse 5'- TTCAGCCACAGTTCACGTTC -3'       |                      |
| <i>Mouse</i>         | Forward 5'- CACTATTTGCCACCTAGCCAC -3'      | NM_021459.4          |
| <i>Isl1</i>          | Reverse 5'- AAATACTGATTACACTCCGCAC -3'     |                      |
| <i>Mouse</i>         | Forward 5'- TGCAGGAGTCCTTCTCCACT -3'       | NM_001032378.2       |
| <i>Cd31 (Pecam1)</i> | Reverse 5'- ACGGTTTGATTCCACTTTGC -3'       |                      |
| <i>Mouse</i>         | Forward 5'- GACCCCTTCATTGACCTCAAC -3'      | NM_001289726.1       |
| <i>Gapdh</i>         | Reverse 5'- CTTCTCCATGGTGGTGAAGA -3'       |                      |
| <i>Human</i>         | Forward 5'- CTGGTTGCAGAATGCGAAGT -3'       | NM_001297704.1       |
| <i>LPHN2</i>         | Reverse 5'- CAAATCTTGTCATCCGTCG -3         |                      |
| <i>Human</i>         | Forward 5'- AACATCATCCCTGCCTCTAC -3'       | NM_001256799.2       |
| <i>GAPDH</i>         | Reverse 5'- CCCTGTTGCTGTAGCCAAAT -3'       |                      |

**Table S2.** Antibodies, Cytokines, and Reagents

| <b>Primary antibody</b>                     | <b>Cat. #</b> | <b>Company</b> | <b>Application</b> |
|---------------------------------------------|---------------|----------------|--------------------|
| Anti-Mouse CD309 (FLK-1) Biotin             | 13-5821-82    | eBioscience    | FC                 |
| Anti-Mouse CD140a (PDGFR- $\alpha$ ) APC    | 17-1401-81    | eBioscience    | FC                 |
| Anti-Human/Mouse OCT3/4 PE                  | 12-5841-80    | eBioscience    | FC                 |
| Nanog                                       | 3580          | cell signaling | FC                 |
| Oct3/4                                      | sc-9081       | Santa Cruz     | IF                 |
| Nkx2.5                                      | sc-8697       | Santa Cruz     | FC                 |
| Anti-Cardiac Troponin T                     | ab10214       | Abcam          | FC                 |
| Anti-Sarcomeric Alpha Actinin               | ab9465        | Abcam          | FC, IF             |
| Monoclonal Anti- $\alpha$ -Sarcomeric Actin | A2172         | Sigma-Aldrich  | IF                 |
| GFAP                                        | sc-6170       | Santa Cruz     | FC                 |
| AFP                                         | sc-15375      | Santa Cruz     | FC                 |
| PECAM-1 (CD31)                              | sc-1506-R     | Santa Cruz     | IF                 |
| VE-Cadherin                                 | sc-6458       | Santa Cruz     | IF                 |
| Latrophilin-2                               | sc-47091      | Santa Cruz     | FC                 |
| Anti-LPHN2                                  | ab101833      | Abcam          | IF                 |
| Phospho-CDK5 [Tyr15]                        | sc-12918      | Santa Cruz     | WB                 |
| Phospho-Src [Ser75]                         | Ab194520      | Abcam          | WB                 |
| Phospho-P38MAPK [Thr180/Tyr182]             | 9211          | cell signaling | WB                 |
| CDK5                                        | 684502        | BioLegend      | WB                 |
| Src                                         | 2109          | cell signaling | WB                 |
| P38MAPK                                     | 9212          | cell signaling | WB                 |
| $\beta$ -actin                              | sc-1615       | Santa Cruz     | WB                 |
| Anti-VEGF Receptor 2 (FLK-1)                | ab10972       | Abcam          | IF                 |
| Lectin from Ulex europaeus (UEA-I)          | L9006         | Sigma-Aldrich  | IF                 |
| Anti-human CD172a/b (SIRP $\alpha/\beta$ )  | 323804        | BioLegend      | FC                 |
| Human VCAM-1/CD106                          | FAB5649G      | R&D systems    | FC                 |
| Human ROR1                                  | FAB2000G      | R&D systems    | FC                 |
| Human CD31                                  | 555446        | BD Pharmingen  | FC                 |
| Human CD144                                 | 17-1449-42    | eBioscience    | FC                 |
| Human PDGFR- $\alpha$                       | FAB1264A      | R&D systems    | FC                 |

| <b>Secondary Antibody</b>                         | <b>Cat. #</b> | <b>Company</b> | <b>Application</b> |
|---------------------------------------------------|---------------|----------------|--------------------|
| Streptavidin PE                                   | 12-4317-87    | eBioscience    | FC                 |
| Alexa Fluor 488 Donkey Anti-Goat IgG              | A11055        | Invitrogen     | IF, FC             |
| Alexa Fluor 488 Donkey anti-Rabbit IgG            | A21206        | Invitrogen     | IF                 |
| Alexa Fluor 488 Goat Anti-Chicken IgG             | A11039        | Invitrogen     | IF                 |
| Alexa Fluor 555 Goat Anti-Mouse IgG               | A21422        | Invitrogen     | IF                 |
| Alexa Fluor 555 Donkey anti-Rabbit IgG            | A31572        | Invitrogen     | IF                 |
| Alexa Fluor 555 Donkey Anti-Goat IgG              | A21432        | Invitrogen     | IF                 |
| Alexa Fluor 555 Goat anti-Mouse IgM( $\mu$ chain) | A21426        | Invitrogen     | IF                 |
| Streptavidin, Alexa Fluor 555 Conjugate           | S32355        | Invitrogen     | IF                 |
| Alexa Fluor 647 Donkey anti-Rabbit IgG            | A31573        | Invitrogen     | IF, FC             |
| Alexa Fluor 647 Donkey anti-Goat IgG              | A21447        | Invitrogen     | IF, FC             |
| Alexa Fluor 647 Donkey anti-Mouse IgG             | A31571        | Invitrogen     | IF, FC             |
| Alexa Fluor 647 Goat anti-Mouse IgM( $\mu$ chain) | A21238        | Invitrogen     | IF                 |
| <b>Cytokines and Reagents</b>                     | <b>Cat. #</b> | <b>Company</b> |                    |
| Activin A                                         | 338-AC        | R&D Systems    |                    |
| BMP-4                                             | 5020-BP       | R&D Systems    |                    |
| bFGF                                              | 13256029      | Invitrogen     |                    |
| EGF                                               | 236-EG        | R&D Systems    |                    |
| Cardiotrophin-1                                   | 612-CD        | R&D Systems    |                    |
| VEGF 164                                          | 493-MV        | R&D Systems    |                    |
| Recombinant human VEGF 165                        | 293-VE-050    | R&D Systems    |                    |
| Recombinant human PDGF-BB                         | 220-BB-010    | R&D Systems    |                    |
| Leukaemia Inhibitory Factor (LIF)                 | ESG1107       | Millipore      |                    |
| $\alpha$ -Latrotoxin                              | LSP-130       | Alomone labs   |                    |
| FLRT3                                             | 2795-FL       | R&D Systems    |                    |

**FC : Flow Cytometry, IF : ImmunoFluorescence, WB : Western Blot**

## **Supplemental Experimental Procedures**

### ***RNA isolation and qPCR***

Total RNA was prepared using QIAshredder and RNeasy Mini Kit (Qiagen, Inc.) according to the manufacturer's instructions. RNA (1 µg) was converted into cDNA using the ReverTra Ace® qPCR RT Master Mix (TOYOBO). qPCR was performed using FastStart Universal SYBR Green Master (Roche) with specific primers. Primer sequences are provided in Table S1. qPCR samples were run on an ABI PRISM-7500 sequence detection system (Applied Biosystems). Data are presented as relative quantification values. Gapdh was run simultaneously as a control and used for normalization.

### ***Antibody array***

1) Sample preparation: The protein was extracted by using protein extraction buffer (Fullmoon biosystems, Sunnyvale, CA) containing 1% protease inhibitor cocktail (Sigma, St. Louis, Mo) and 1% phosphatase inhibitor cocktail (Sigma, St. Louis, Mo) and lysis beads (Fullmoon biosystems, Sunnyvale, CA). After extraction, the protein solution was purified using gel matrix column that was included in antibody array assay kit (Fullmoon biosystems, Sunnyvale, CA). The column was vortex-mixed at 5 seconds and hydration-treated at 60 minutes on room temperature. After hydration, the column was centrifuged at 750 g for 2 minutes. After centrifuge, the column was placed into a collect tube and the 100 µl of protein sample was transferred into column. The column was centrifuged at 750 g for 2 minutes. The concentration of purified sample was measured with BCA protein assay kit (Pierce, Rockford, Ill) using NanoPhotometer™ (Implen, UK). Moreover, the purity of purified sample was confirmed on UV spectrum.

2) Phospho Explorer Antibody Array: The 50  $\mu\text{g}$  of protein sample was filled up 75  $\mu\text{l}$  with labeling buffer and treated 3  $\mu\text{l}$  of the 10  $\mu\text{g}/\mu\text{l}$  biotin/DMF solution. The sample was incubated at room temperature for 90 min with mixing. After incubation, the sample was treated 35  $\mu\text{l}$  of stop reagent and incubated at room temperature for 30 min with mixing. The antibody microarray slide (Fullmoon biosystems, Sunnyvale, CA) was treated 30 ml of blocking solution in a petri dish and incubated on shaker at 60 rpm for 30 min at room temperature and washed with distilled water. This step was replicated three times. After blocking, the slide was rinsed with Milli-Q grade water. The labeled sample was mixed in 6 ml of coupling solution. The blocked array slide was incubated with coupling mixture on shaker at 60 rpm for 2 hours at room temperature into coupling dish. After coupling, the slide was washed 6 times with 30 ml of washing solution into petri dish on shaker at 60 rpm for 5 minutes. Next, the slide rinsed with Milli-Q grade. The 30  $\mu\text{l}$  of 0.5 mg/ml Cy3-streptavidin (GE Healthcare, Chalfont St. Giles, UK) was mixed in 30 ml of detection buffer. The coupled array slide was treated with detection mixture into petri dish on shaker at 60 rpm for 20 minutes at room temperature. After detecting, the slide was washed 6 times with 30 ml of washing solution into petri dish on shaker at 60 rpm for 5 minutes. Next, the slide rinsed with Milli-Q grade water.

3) Data acquisition and analysis: The slide scanning was performed using GenePix 4100A scanner (Axon Instrument, USA). The slides were absolutely dried before the scanning and scanned within 24~48 hours. The slides were scanned at 10  $\mu\text{m}$  resolution, optimal laser power and PMT. After got the scan image, they were grided and quantified with GenePix 7.0 Software (Axon Instrument, USA). The normalization data were analyzed using Genowiz 4.0TM (Ocimum Biosolutions, India). This normalization makes the average intensity of all samples numerically equivalent to the average intensity of the all genes. Moreover, the *p*-value (one-



sample *t*-test) was calculated using MeV 4.9.0 Software (TM4 Development Group, USA). After analyzing, the data about protein information was annotated using UniProt DB. The phosphorylation ratio was calculated using the following formula (phosphorylated and matching unphosphorylated values are denoted by phospho and unphospho in both the differentiation day 3 and day 4).

$$\text{Phosphorylation ratio} = (\text{phospho of differentiation day 4} / \text{unphospho of day 4}) / (\text{phospho of differentiation day 3} / \text{unphospho of day 3})$$

Antibody array results are accessible at the GEO database (accession number, GSE92923).

### ***Western blot***

Cells were harvested and lysed for 30 minutes in lysis buffer containing protease inhibitors (Roche, Basel, Switzerland). Total protein (40  $\mu$ g) was immunoblotted with primary antibodies against phospho-CDK5 [Tyr15] (Santa Cruz Biotechnology, Dallas, TX, USA; goat polyclonal; molecular weight = 35 kDa), phospho-Src [Ser75] (Abcam, Cambridge, UK; rabbit polyclonal; molecular weight = 60 kDa), phospho-P38MAPK [Thr180/Tyr182] (Cell Signaling, Danvers, MA, USA; rabbit polyclonal; molecular weight = 43 kDa), total-CDK5 (BioLegend, San Diego, USA; mouse monoclonal; molecular weight = 35 kDa), total-Src (Cell Signaling, Danvers, MA, USA; rabbit monoclonal; molecular weight = 60 kDa), total-P38MAPK (Cell Signaling, Danvers, MA, USA; rabbit polyclonal; molecular weight = 43 kDa), and  $\beta$ -actin (Santa Cruz Biotechnology, Dallas, TX, USA; goat polyclonal; molecular weight = 43 kDa). Horseradish peroxidase (HRP)-conjugated anti-rabbit IgG (for phospho-Src, and phospho-P38MAPK, total-Src, total-P38MAPK; Santa Cruz Biotechnology, Dallas, TX, USA), anti-goat IgG (for phospho-CDK5 and  $\beta$ -actin; Santa Cruz Biotechnology, Dallas, TX, USA) and anti-mouse IgG (for total-

CDK5; Santa Cruz Biotechnology, Dallas, TX, USA) antibodies were used as secondary antibodies. Amersham ECL western blotting detection reagents (GE Healthcare Life Sciences, Chicago, IL, USA) were used for detection. Quantification of band intensity was analyzed using TINA software, version 2.0 (RayTest, Straubenhardt, Germany), and was normalized to the total-form antibody.

### ***Endothelial and smooth muscle differentiation of Human PSC***

For endothelial and smooth muscle differentiation of human PSCs, we optimized using the previously described protocols. Human PSCs were directed towards the cardiac progenitor cells until day 5. After day 5 sorting, KDR<sup>+</sup> or LPHN2<sup>+</sup> cells were induced in EGM-2MV medium (Cat. #: CC-3124, LONZA) supplemented with 50 ng/ml VEGF and 5  $\mu$ M SB431542 for endothelial, or 8 ng/ml PDGF-BB and 10 ng/ml bFGF for smooth muscle differentiation.

### ***Immunofluorescence staining***

Cells were fixed with 2% paraformaldehyde (PFA, Wako) for 10 minutes at room temperature. After being washed with PBS and blocked with PBS containing 0.05% Triton-X100 and 1% BSA, the cells were incubated with primary antibodies for 18 hrs at 4°C. After washing, corresponding secondary antibodies were applied for 1 h at room temperature. The nuclei were counterstained with 4', 6-diamidino-2-phenylindole (DAPI) and mounted using the fluorescent mounting medium (DAKO). Fluorescent images were acquired with an LSM710 confocal microscope (Zeiss) and a confocal microscope Leica TCS SP8 (Leica Microsystems, Wetzlar, Germany). Information of the primary and secondary antibodies for immunofluorescence is provided in Table S2.

### ***Flow cytometric analysis and cell sorting***

EBs were harvested and treated with Accutase (eBioscience) for 5 min at 37°C to dissociate cells. Cells were then washed with PBS, stained with specific antibodies (Table S2) for lineage markers. The fixation and permeabilization buffer kit (R&D system) was used as recommended in the manufacturer's instructions for intracellular staining of OCT3/4, NANOG, cTNT,  $\alpha$ -SA, NKX2.5, GFAP, and AFP. Analysis of stained cells and sorting were performed by flow cytometry using fluorescence-activated cell sorting (FACS) Canto II TM or Aria II TM (BD Biosciences) and obtained data were analyzed by FlowJo (Tree Star, Ashland, OR, USA).

### ***Lentiviral transduction***

For *Lphn2* knockdown in iPSCs, five shRNA constructs targeting different regions of the *Lphn2* gene were used (Sigma-Aldrich, SHCLNV, MISSION® shRNA Lentiviral Transduction Particles, TRCN0000238691, TRCN0000238692, TRCN0000238693, TRCN0000238694, TRCN0000238695). Non-Target shRNA Control Transduction Particles (Sigma-Aldrich, SHC216V) was used as the shRNA negative control. Transduction was performed according to manufacturer's instructions. At 48 hrs after transduction, protein-iPSCs were selected in growth medium containing puromycin (5  $\mu$ g/ml, Sigma-Aldrich). Transduced iPSCs were analyzed for *Lphn2* knockdown efficiency using qPCR.

### ***Lphn2-KO ESCs***

*Lphn2*-KO ESCs ( $Lphn2^{tm1a}$  (EUCOMM) *Hmgu*, EUCOMM) were purchased from EUCOMM. *Lphn2*-KO ESCs were cultured in knockout DMEM (Gibco) including 10% fetal bovine serum,

0.1 mM  $\beta$ -mercaptoethanol (Sigma-Aldrich, filter sterilized), 2 mM L-glutamine, 50 IU/mL penicillin, 50 mg/mL streptomycin (Gibco), and LIF (2000 U/mL) on MEF as feeder-layer cells.
